# Supplementary material for: Facile Synthesis of Ce-MOF for the Removal of Phosphate, Fluoride, and Arsenic
Source: MDPI journal article supplement (doi:10.3390/nano13233048), 2023-11-29
Supplement: s1 [file s1]

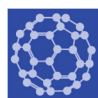

## Supplementary Materials:

# Facile Synthesis of Ce-MOF for the Removal of Phosphate, Fluoride, and Arsenic

Lili Zhang <sup>1,†</sup>, Decheng Mao <sup>2,†</sup>, Yining Qu <sup>2</sup>, Xiaohong Chen <sup>2</sup>, Jindi Zhang <sup>1</sup>, Mengyang Huang <sup>1,\*</sup> and Jiaqiang Wang <sup>1,2,\*</sup>

## Text S1

All reagents were of analytical grade. The reagents used included sodium phosphate ( $\text{NaH}_2\text{PO}_4 \cdot 2\text{H}_2\text{O}$ , AR, Tianjin Fengchuan Chemical Technologies Co., Ltd), sodium fluoride ( $\text{NaF}$ , AR, Chongqing Chuandong Chemical Group Co., Ltd), arsenic(V) ( $\text{H}_5\text{AsO}_4$ , AR, Chongqing Chuandong Chemical Group Co., Ltd), 1,3,5-Benzenetricarboxylic acid ( $\text{H}_3\text{BTC}$ , Sinopharm Chemical Reagent Co., Ltd,  $\geq 99\%$ ), terephthalic acid ( $\text{H}_2\text{BDC}$ , Sinopharm Chemical Reagent Co., Ltd,  $\geq 99\%$ ), cerium nitrate ( $\text{Ce}(\text{NO}_3)_3 \cdot 6\text{H}_2\text{O}$ , Tianjin Guangfu Fine Chemical Research Institute,  $\geq 99\%$ ), cerium chloride ( $\text{CeCl}_3 \cdot 6\text{H}_2\text{O}$ , Tianjin Guangfu Fine Chemical Research Institute,  $\geq 99\%$ ), cerium sulfate ( $\text{Ce}_2(\text{SO}_4)_3 \cdot 8\text{H}_2\text{O}$ , Tianjin Guangfu Fine Chemical Research Institute,  $\geq 99\%$ ), N,N-dimethyl-formamide (DMF, AR, Xilong Chemical Co., Ltd), and ethanol (AR, Xilong Chemical Co., Ltd).

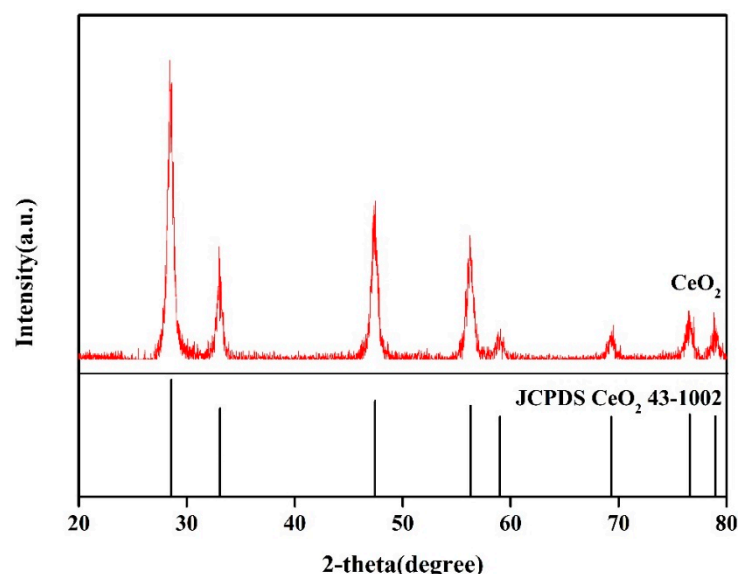

Figure S1. XRD patterns for  $\text{CeO}_2$ .

Table S1. Optimization and screening of solvent amount.

| DMF (mL) | Phosphate removal rate after 1 h |
|----------|----------------------------------|
| 100      | 77.7%                            |
| 80       | 89.8%                            |

|    |       |
|----|-------|
| 60 | 92.5% |
| 40 | 78.9% |

**Table S2.** Screening of reaction temperature.

| Temperature °C | Phosphate removal rate after 1 h |
|----------------|----------------------------------|
| 200            | 87.9%                            |
| 180            | 97.5%                            |
| 150            | 91.7%                            |
| 100            | 67.2%                            |

**Table S3.** Optimization of reaction time and screening.

| Time | Phosphate removal rate after 1 h |
|------|----------------------------------|
| 4d   | 96.8%                            |
| 3d   | 97.9%                            |
| 2d   | 89.8%                            |
| 1d   | 77.2%                            |

**Table S4.** Comparison of adsorption capacity of some conventional adsorbents for fluoride, arsenate, and phosphate according to the literature.

| Adsorbents                                                                                                         | Adsorption capacity (mg g <sup>-1</sup> ) |          |         | Reference |
|--------------------------------------------------------------------------------------------------------------------|-------------------------------------------|----------|---------|-----------|
|                                                                                                                    | Phosphate                                 | Fluoride | Arsenic |           |
| Mg–Al–Fe layered double hydroxide/polyether sulfone-mixed matrix membranes                                         | 5.61                                      | 1.61     | —       | [1]       |
| Modified saxaul ash                                                                                                | —                                         | —        | 4.203   | [2]       |
| Magnetic particles sprayed with gelatin with embedded hydrotalcite composite Fe <sub>3</sub> O <sub>4</sub> @GelHT | 32.73                                     | —        | —       | [3]       |
| Calcined La-doped layered double hydroxides                                                                        | —                                         | 62.33    | 87.3    | [4]       |

|        |      |       |      |            |
|--------|------|-------|------|------------|
| Ce-MOF | 41.2 | 101.8 | 33.3 | This study |
|--------|------|-------|------|------------|

**Table S5.** Phosphate adsorption capacity of various materials.

| Adsorbent                                                    | pH  | Adsorption capacity<br>(mg g <sup>-1</sup> ) | Ref.       |
|--------------------------------------------------------------|-----|----------------------------------------------|------------|
| Fe <sub>3</sub> O <sub>4</sub> @NH <sub>2</sub> -MIL-101(Fe) | 7.0 | 36.6                                         | [5]        |
| Ce-MOF                                                       | 7.0 | 41.2                                         | This study |

**Table S6.** Fluoride adsorption capacity of various materials.

| Adsorbent | pH   | Adsorption capacity<br>(mg g <sup>-1</sup> ) | Ref.       |
|-----------|------|----------------------------------------------|------------|
| Ce-MIL-96 | 3-10 | 52.1                                         | [6]        |
| MOF-801   | 2.0  | 13.6                                         | [7]        |
| UiO-66    | 6.8  | 33.4                                         | [8]        |
| Ce-MOF    | 7.0  | 101.8                                        | This study |

**Table S7.** Arsenic(V) adsorption capacity of various materials.

| Adsorbent  | pH   | Adsorption capacity<br>(mg g <sup>-1</sup> ) | Ref.       |
|------------|------|----------------------------------------------|------------|
| Fe-BTC     | 2-10 | 12.3                                         | [9]        |
| MOF-808    | 4.0  | 13.6                                         | [10]       |
| MIL-53(Fe) | 5.0  | 21.3                                         | [11]       |
| Ce-MOF     | 7.0  | 33.3                                         | This study |

## References

1. Pintor, A.M.; Vilar, V.J.; Botelho, C.M.; Boaventura, R.A. Oil and grease removal from wastewaters: Sorption treatment as an alternative to state-of-the-art technologies. A critical review. *Chem. Eng. J.* **2016**, *297*, 229–255.
2. Liu, X.; Yu, X.; Sha, L.; Wang, Y.; Zhou, Z.; Zhang, S. The preparation of black titanium oxide nanoarray via coking fluorinated wastewater and application on coking wastewater treatment. *Chemosphere* **2021**, *270*, 128609.
3. Rosales, M.; Coreño, O.; Nava, J.L. Removal of hydrated silica, fluoride and arsenic from groundwater by electrocoagulation using a continuous reactor with a twelve-cell stack. *Chemosphere* **2018**, *211*, 149–155.
4. Rahdar, S.; Taghavi, M.; Khaksefidi, R.; Ahmadi, S. Adsorption of arsenic (V) from aqueous solution using modified saxaul ash: Isotherm and thermodynamic study. *Appl. Water. Sci.* **2019**, *9*, 87.
5. Zhou, R.Y.; Yu, J.X.; Chi, R.A. Selective removal of phosphate from aqueous solution by MIL-101 (Fe)/bagasse composite prepared through bagasse size control. *Environ. Res.* **2020**, *188*, 109817.
6. Yang, X.; Deng, S.; Peng, F.; Luo, T. A new adsorbent of a Ce ion-implanted metal–organic framework (MIL-96) with high-efficiency Ce utilization for removing fluoride from water. *Dalton Trans.* **2017**, *46*, 1996–2006.
7. Zhu, X.; Yang, C.; Yan, X. Metal-organic framework-801 for efficient removal of fluoride from water. *Microporous Mesoporous Mater.* **2018**, *259*, 163–170.
8. Zhao, X.; Liu, D.; Huang, H.; Zhang, W.; Yang, Q.; Zhong, C. The stability and defluoridation performance of MOFs in fluoride solutions. *Microporous Mesoporous Mater.* **2014**, *185*, 72–78.

9. Zhu, B.; Yu, X.; Jia, Y.; Peng, F.; Sun, B.; Zhang, M.; Huang, X. Iron and 1, 3, 5-benzenetricarboxylic metal–organic coordination polymers prepared by solvothermal method and their application in efficient As (V) removal from aqueous solutions. *J. Phys. Chem. C* **2012**, *116*, 8601–8607.
10. Li, Z.; Yang, J.; Sui, K.; Yin, N. Facile synthesis of metal-organic framework MOF-808 for arsenic removal. *Mater. Lett.* **2015**, *160*, 412–414.
11. Vu, T.A.; Le, G.H.; Dao, C.D.; Dang, L.Q.; Nguyen, K.T.; Nguyen, Q.K.; Lee, G.D. Arsenic removal from aqueous solutions by adsorption using novel MIL-53 (Fe) as a highly efficient adsorbent. *RSC Adv.* **2015**, *5*, 5261–5268.
